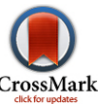

# Intracellular Cleavage of Amyloid $\beta$ by a Viral Protease Nla Prevents Amyloid $\beta$ -Mediated Cytotoxicity

Baehyun Shin<sup>1,3</sup>, Hyejin Oh<sup>2,3</sup>, Sang Min Park<sup>1</sup>, Hye-Eun Han<sup>1</sup>, Michael Ye<sup>1</sup>, Woo Keun Song<sup>2</sup>, Woo Jin Park<sup>1\*</sup>

**1** School of Life Sciences, Gwangju Institute of Science and Technology, Gwangju, Korea, **2** Bio Imaging and Cell Dynamics Research Center, School of Life Sciences, Gwangju Institute of Science and Technology, Gwangju, Korea, **3** Center for Human Genetic Research, Massachusetts General Hospital, Boston, Massachusetts, United States of America

## Abstract

Nuclear inclusion a (Nla) of turnip mosaic virus is a cytosolic protease that cleaves amyloid  $\beta$  (A $\beta$ ) when heterologously overexpressed. Lentivirus-mediated expression of Nla in the brains of APP(sw)/PS1 mice significantly reduces cerebral A $\beta$  levels and plaque depositions, and improves behavioral deficits. Here, the effects of Nla and neprilysin (NEP), a well-known A $\beta$ -cleaving protease, on oligomeric A $\beta$ -induced cell death were evaluated. Nla cleaved monomeric and oligomeric A $\beta$  at a similar rate, whereas NEP only cleaved monomeric A $\beta$ . Oligomeric A $\beta$ -induced cytotoxicity and mitochondrial dysfunction were significantly ameliorated by Nla, but not by NEP. Endocytosed fluorescently-labeled A $\beta$  localized to mitochondria, and this was significantly reduced by Nla, but not by NEP. These data suggest that Nla may exert its protective roles by degrading A $\beta$  and thus preventing mitochondrial deposition of A $\beta$ .

**Citation:** Shin B, Oh H, Park SM, Han H-E, Ye M, et al. (2014) Intracellular Cleavage of Amyloid  $\beta$  by a Viral Protease Nla Prevents Amyloid  $\beta$ -Mediated Cytotoxicity. PLoS ONE 9(6): e98650. doi:10.1371/journal.pone.0098650

**Editor:** Stefan F.T. Weiss, University of the Witwatersrand, South Africa

**Received:** June 4, 2013; **Accepted:** May 6, 2014; **Published:** June 10, 2014

**Copyright:** © 2014 Shin et al. This is an open-access article distributed under the terms of the Creative Commons Attribution License, which permits unrestricted use, distribution, and reproduction in any medium, provided the original author and source are credited.

**Funding:** This work was supported by a grant from the National Research Foundation of Korea (2009-0085747) and by the Global Research Laboratory Program (M6-0605-00-0001) funded by the Korean Government (MEST) and by a grant from the Systems Biology Infrastructure Establishment Grant provided by GIST. The funders had no role in study design, data collection and analysis, decision to publish, or preparation of the manuscript.

**Competing Interests:** The authors have declared that no competing interests exist.

\* E-mail: woojinpark@me.com

## Introduction

Alzheimer's disease (AD) is the most prevalent neurodegenerative disorder that is characterized by progressive memory impairment and cognitive dysfunction. The hallmarks of AD are the formation of intracellular neurofibrillary tangles composed of hyper-phosphorylated tau and extracellular amyloid plaques mainly composed of amyloid  $\beta$  (A $\beta$ ). A $\beta$  is generated through sequential cleavage of amyloid precursor protein (APP) by  $\beta$ - and  $\gamma$ -secretases [1,2].

A $\beta$  exists as soluble monomers and oligomers, and insoluble fibrils. Which of these forms of A $\beta$  is the active species that are responsible for synaptic loss and neurodegeneration in AD is controversial [3,4]. Neither monomeric nor fibrillar forms of A $\beta$  appear to be responsible [4,5]. Rather, a number of studies indicate that oligomeric A $\beta$  is the most potent neurotoxic species in association with AD [6,7,8,9,10]. For example, oligomeric A $\beta$  reduces neuronal viability approximately 10-fold more efficiently than fibrillar A $\beta$  [11].

A $\beta$  levels in healthy brain are delicately regulated by a dynamic equilibrium between production of A $\beta$  from APP and clearance of A $\beta$  via perivascular drainage or enzymatic degradation. The cytotoxic process of AD is closely linked to an imbalance between the production and clearance of A $\beta$  [12]. Therefore, restoration of this balance by increasing the degradation of A $\beta$  might be a valid therapeutic modality for the treatment of AD [13]. Several endogenous proteases can degrade A $\beta$ . Among these, neprilysin (NEP) is considered to be the physiological regulator of the A $\beta$

levels in the brain parenchyma [14,15,16]. Intracerebral injections of a recombinant lentivirus expressing human NEP reduce A $\beta$  deposits and neurodegenerative alterations in a mouse model of amyloidosis [17]. Implantation of primary fibroblast cells that express a secreted form of human NEP also significantly reduces plaque burdens in the mouse brain [18]. Consistently, the genetic ablation of NEP in mice markedly increases A $\beta$  levels in whole brain and plasma, increases plaque burdens in the hippocampus, and leads to the development of AD-like neuropathology [19]. Lentivirus-mediated long-term expression of NEP improves behavioral performances and ameliorates neurodegenerative pathology in APP mice [20]. However, the therapeutic potential of NEP is controversial as over-expression of NEP failed to reduce the toxic oligomeric A $\beta$  levels nor improve cognitive deficits in AD mice although it did reduce plaque formation [21].

Nuclear inclusion a (Nla) of turnip mosaic virus is a cytosolic protease with a strict substrate specificity for the consensus sequence of Val-Xaa-His-Gln [22]. In an *in vitro* study, we demonstrated that Nla specifically cleaves A $\beta$ , which contains the Val-His-His-Gln sequence near to its putative  $\alpha$ -secretase cleavage site [23]. We further showed that lentivirus-mediated expression of Nla in the brain of AD mice significantly reduced A $\beta$  pathology and improved behavioral deficits [23,24].

Several lines of evidence have suggested that the progression of AD may be associated with mitochondrial dysfunction [25,26]. A $\beta$  inhibits import of nuclear-encoded mitochondrial proteins, and subsequently impairs mitochondrial functions and morphology [27]. In neurons, the overexpression of A $\beta$  results in mitochondrial

fragmentation and an abnormal subcellular distribution of mitochondria by evoking an imbalance between mitochondrial fusion and fission [28]. Furthermore, A $\beta$  impairs oxidative phosphorylation and ATP production in transgenic AD mice [29].

Here, we compared the functions of N1a and NEP, and found that N1a, but not NEP, cleaved oligomeric A $\beta$  and prevented A $\beta$ -induced cytotoxicity and mitochondrial dysfunction in human neuroblastoma cells. By tracing exogenously added A $\beta$ , we determined that N1a prevents localization of endocytosed A $\beta$  to mitochondria. Our study suggests that disruption of A $\beta$  trafficking to mitochondria via intracellular degradation of A $\beta$  is a valuable approach for preventing A $\beta$ -induced cytotoxicity.

## Results

### N1a, but not NEP, Cleaves Oligomeric A $\beta$ *In vitro*

We first performed an *in vitro* cleavage assay to compare the proteolytic activities of N1a and NEP for A $\beta$ . Monomeric and oligomeric A $\beta$  were incubated with the same amounts of purified N1a and NEP, and were then analyzed by Western blotting. Cleavage of A $\beta$  was discerned by the disappearance of protein bands corresponding to intact monomeric and oligomeric A $\beta$ . As expected, monomeric A $\beta$  was efficiently cleaved by both N1a and NEP (Figure 1). However, oligomeric A $\beta$  was only cleaved by N1a, not by NEP (Figure 1B). Notably, N1a cleaved both monomeric and oligomeric A $\beta$  indistinguishably with a similar catalytic activity. To the best of our knowledge, N1a is the only cytosolic

protease that can cleave both monomeric and oligomeric A $\beta$  with a strict substrate specificity.

### N1a, but not NEP, Prevents Oligomeric A $\beta$ -mediated Cytotoxicity

We next examined whether N1a or NEP can inhibit oligomeric A $\beta$ -mediated cytotoxicity in human neuroblastoma SH-SY5Y cells. The cells were transformed with plasmids expressing HA-tagged N1a or NEP. Expression of N1a and NEP was assessed by Western blotting with an anti-HA antibody (Figure 2A). The amounts of plasmids used for cell transformations were adjusted so that the expression levels of N1a and NEP were almost equal in all the subsequent experiments.

Treatment of SH-SY5Y cells with oligomeric A $\beta$  for 48 h reduced cell viability in a dose-dependent manner (Figure S1). The most prominent effects were seen with 10–20  $\mu$ M A $\beta$ . Thus, 10  $\mu$ M oligomeric A $\beta$  was used to observe the cytotoxic effects of A $\beta$  in all the subsequent experiments. Under these conditions, A $\beta$  reduced cell viability by ~35% as assessed by 3-[4,5-dimethylthiazol-2-yl]-2,5-diphenyl tetrazolium bromide (MTT) assays (Figure 2B). This effect was significantly inhibited by N1a (~16% reduction vs. control) but not by NEP (Figure 2B). A $\beta$ -mediated cytotoxicity can also be monitored by nuclear fragmentation and condensation, a phenomenon known as pyknosis. Under control conditions, only 1–2% of cells underwent pyknosis as observed using a fluorescence microscope. In line with previous reports [30,31], A $\beta$  increased the percentage of pyknotic cells to ~17%. This A $\beta$ -mediated pyknosis was significantly reduced by

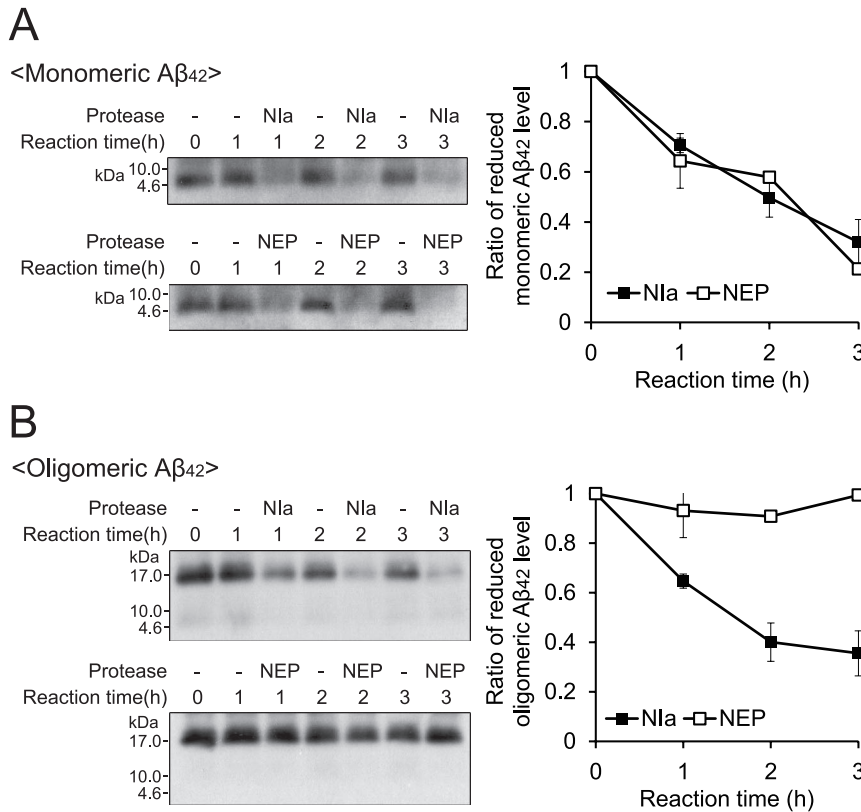

**Figure 1. In vitro cleavage of A $\beta$  by N1a and NEP.** For the cleavage assay, 2.5  $\mu$ M of monomeric (A) and oligomeric A $\beta$  (B) were incubated with 0.5  $\mu$ M of purified N1a or NEP for 1, 2, and 3 h. The reaction mixture was separated on a PeptiGel (Elpis Biotech), blotted, and probed with the anti-A $\beta$  6E10 antibody. The densities of the intact A $\beta$  bands were quantified using NIH ImageJ software and plotted. Each data point and error bar represents the mean  $\pm$  SD (n=3).

doi:10.1371/journal.pone.0098650.g001

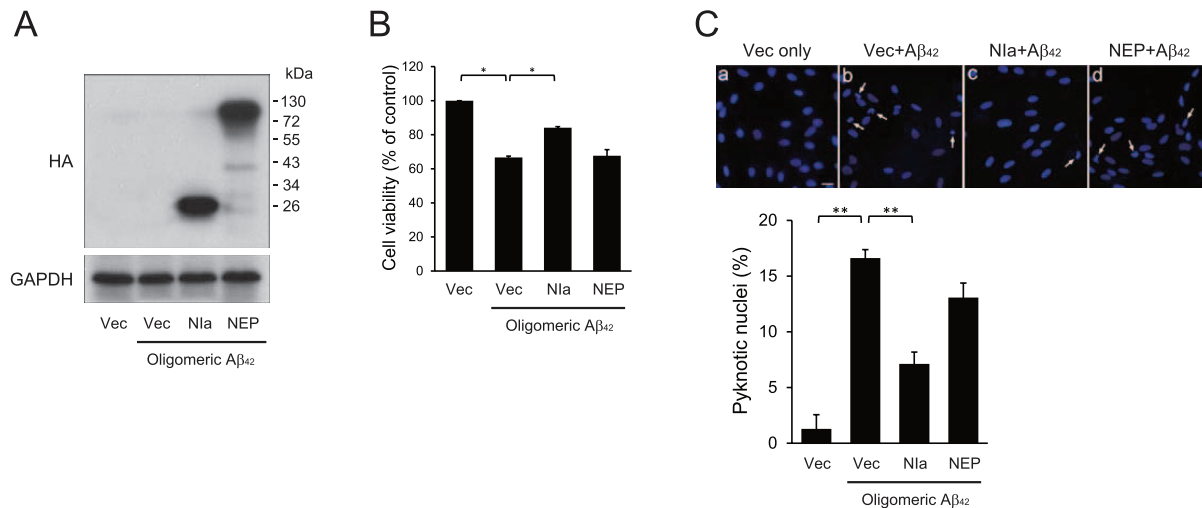

**Figure 2. N1a, but not NEP, prevents A $\beta$ -mediated cytotoxicity.** Human neuroblastoma SH-SY5Y cells were transfected with pcDNA with no insert (Vec), or with pcDNA with cDNA encoding HA-N1a (N1a) or HA-NEP (NEP). After 24 h of incubation, cells were treated with 10  $\mu$ M of oligomeric A $\beta$  for an additional 48 h. **(A)** Western blotting with an anti-HA antibody showed that the expression levels of N1a and NEP were similar. GAPDH (detected with an anti-GAPDH antibody) was used as the loading control. **(B)** Cell viability was determined by using the MTT assay. Each bar and error bar represents the mean  $\pm$  SD (n=3); \**p*<0.05. **(C)** Cells were stained with Hoechst 33342 and viewed under a fluorescence microscope. Arrows indicate cells with pyknotic nuclei. The number of pyknotic nuclei was counted and plotted. Scale bar, 50  $\mu$ m. Each bar and error bar represents the mean  $\pm$  SD (n=8); \*\**p*<0.01. doi:10.1371/journal.pone.0098650.g002

N1a (~7%), but not by NEP (Figure 2C). Collectively, these results indicate that N1a, but not NEP, prevents oligomeric A $\beta$ -mediated cytotoxicity.

### N1a, but not NEP, Ameliorates Oligomeric A $\beta$ -mediated Mitochondrial Dysfunction

A $\beta$  reportedly is associated with mitochondrial dysfunction [27]. Thus, we examined whether N1a or NEP affect A $\beta$ -induced mitochondrial dysfunction in SH-SY5Y cells. To monitor mitochondrial membrane potential ( $\Psi$ m) using a confocal microscope, we utilized JC-1, which exists as a green-fluorescent J-monomer at depolarized membrane potentials and as a red-fluorescent J-aggregate at hyperpolarized membrane potentials. A decrease in the ratio of red fluorescence to green fluorescence indicates a decrease in  $\Psi$ m. As expected, A $\beta$  significantly reduced  $\Psi$ m, which was reversed by N1a, but not by NEP (Figure 3A).

Next, we utilized the cell-permeable fluorescent dye dihydroethidium (DHE) to monitor the production of reactive oxygen species (ROS). When DHE is oxidized by superoxide anions to oxoethidium, it intercalates into DNA and generates red fluorescence [32]. In line with previous reports [33], A $\beta$  increased the percentage of cells with red fluorescence (~33% vs. ~12% in control), which was significantly attenuated by N1a (~21%), but not by NEP (Figure 3B). Taken together, these data indicate that N1a, but not NEP, ameliorates A $\beta$ -mediated mitochondrial dysfunction.

### N1a, but not NEP, Prevents Accumulation of A $\beta$ in Mitochondria

We next sought to elucidate how N1a prevents A $\beta$ -mediated mitochondrial dysfunction. To this end, we traced the intracellular trafficking of exogenously added A $\beta$  in SH-SY5Y cells. Oligomeric A $\beta$  was labeled with Alexa Fluor 488 and was then added to the culture media. After 90 min of incubation (pulse), the culture media was replaced with fresh media not containing A $\beta$  and was then further incubated for 90, 270, and 630 min (chase). The cells

were then fixed and co-stained with LysoTracker and MitoTracker. After 90 min of chase, ~10% of LysoTracker, but none of the MitoTracker, co-localized with the Alexa Fluor. This suggested that the majority of the exogenously added A $\beta$  was present in endosomes, some was present in lysosomes, and none was present in mitochondria at this stage. However, the percentage of LysoTracker or MitoTracker that co-localized with Alexa fluorescence gradually increased as the duration of the chase increased. After 630 min of chase, ~35% of LysoTracker and ~5% of MitoTracker co-localized with the Alexa Fluor (Figure 4). These results are consistent with earlier observations that exogenously added A $\beta$  reaches lysosomes via endocytosis, where a portion of the peptide enters mitochondria; however, the mechanism is unknown.

We next examined whether N1a or NEP affect trafficking of oligomeric A $\beta$  to mitochondria. SH-SY5Y cells transformed with plasmids expressing N1a or NEP were treated with Alexa Fluor 488-labeled oligomeric A $\beta$  for 18 h. At this time point, most of the Alexa Fluor co-localized with either LysoTracker or MitoTracker. Under normal conditions, ~25% and ~5% of LysoTracker and MitoTracker, respectively, co-localized with the Alexa Fluor. Neither N1a nor NEP significantly affected the co-localization of LysoTracker with the Alexa Fluor (Figure 5A). However, N1a, but not NEP, significantly reduced the percentage of MitoTracker that co-localized with the Alexa Fluor (~1%) (Figure 5B). Co-localization of MitoTracker and the Alexa Fluor was further confirmed by 3-dimensional reconstruction of the confocal images (Figure S2, Video S1–4). The Alexa Fluor represents intact A $\beta$  after incubation for 18 h, supporting the validity of our experimental approach (Figure S3). Collectively, these data suggest that N1a prevents the accumulation of oligomeric A $\beta$  in mitochondria by proteolytically degrading the peptide in the cytosol.

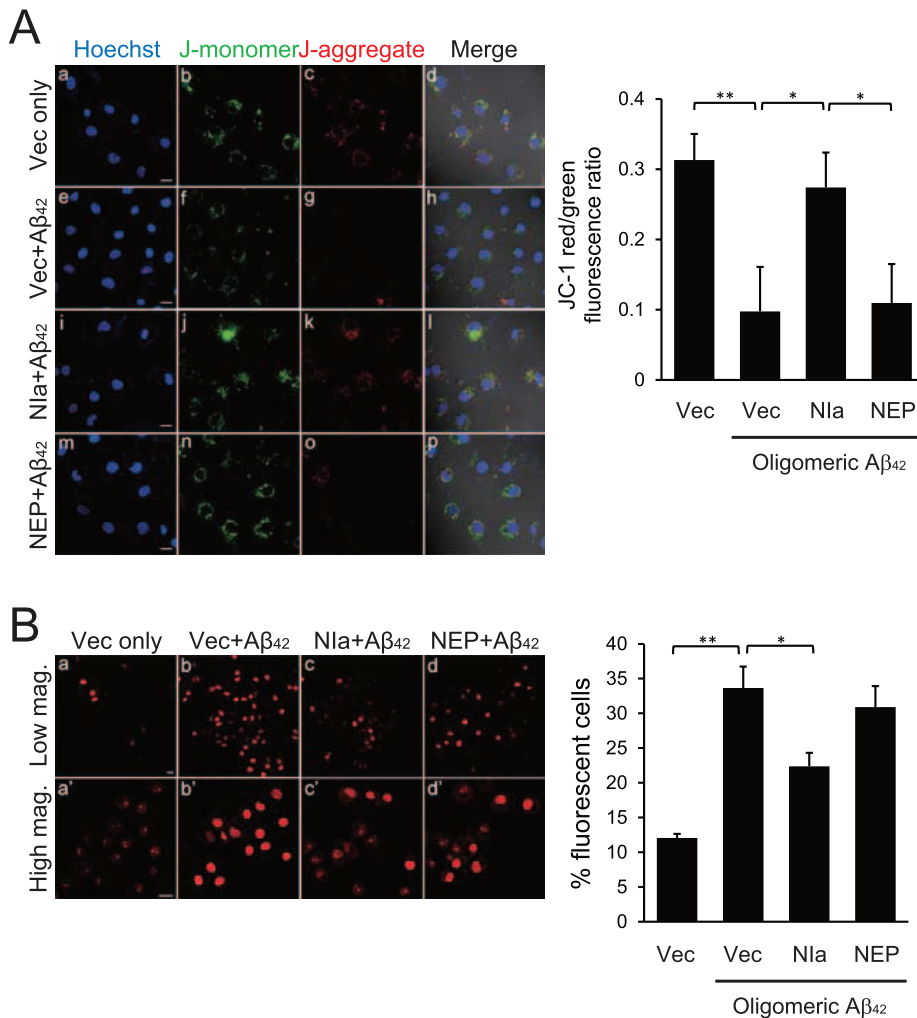

**Figure 3. N1a, but not NEP, restores A $\beta$ -mediated mitochondrial dysfunction.** Human neuroblastoma SH-SY5Y cells were transfected with pcDNA with no insert (Vec), or with pcDNA with cDNA encoding HA-N1a (N1a) or HA-NEP (NEP). After 24 h of incubation, cells were treated with 10  $\mu$ M of oligomeric A $\beta$  for an additional 48 h. **(A)** Cells were treated with 2.5  $\mu$ M of JC-1, an indicator of  $\Psi$ m, for 15 min at 37°C and visualized by confocal microscopy. The intensities of red and green JC-1 fluorescence were quantitated using the MetaMorph imaging software and their ratios were plotted. Scale bar, 50  $\mu$ m. Each bar and error bar represents the mean  $\pm$  SD (n = 7); \*p < 0.05, \*\*p < 0.01. **(B)** Cells were incubated with 30  $\mu$ M of DHE, an indicator of ROS for 30 min. Low (panels a–d) and high (panels a'–d') magnification images of cells were obtained using a confocal microscope. Data represent the number of fluorescent cells as a percentage of the total number of cells in the observed field. Scale bar, 50  $\mu$ m. Each bar and error bar represents the mean  $\pm$  SD (n = 5); \*p < 0.05, \*\*p < 0.01. doi:10.1371/journal.pone.0098650.g003

## Discussion

The N1a protease of turnip mosaic virus has a strict substrate specificity for the consensus sequence of Val-Xaa-His-Gln [22]. This protease is involved in the cleavage of viral polypeptides to generate mature viral proteins. We noticed the same Val-His-His-Gln consensus sequence in A $\beta$  near to its putative  $\alpha$ -secretase cleavage site and surmised that this sequence could be cleaved by N1a. Indeed, N1a specifically cleaves A $\beta$  *in vitro* and significantly reduces A $\beta$ -induced cell death in rat neuroblastoma cells [23]. Furthermore, lentivirus-mediated expression of N1a in the brain of AD mice significantly reduces cerebral A $\beta$  levels and plaque depositions, and recovers behavioral deficits [24]. These results raised the possibility that N1a can be used as a therapeutic modality for the treatment of AD.

Currently, more than 20 endogenous A $\beta$ -cleaving enzymes have been identified [34]. Among them, NEP is considered to have a major role in the metabolism of A $\beta$  in the brain. The possible

therapeutic use of NEP for AD was proposed because NEP ameliorates neurodegenerative pathology and also improves behavioral performances in APP mice [20]. However, this earlier enthusiasm has been challenged. For examples, over-expression of NEP does not improve cognitive deficits in AD mice [21]. This might be explained, at least partially, because NEP cannot cleave the more toxic oligomeric A $\beta$ , as shown here. In addition, it should be noted that NEP has diverse physiological roles in the brain. For example, overexpression of NEP causes a reduction in cAMP-responsive element-binding protein-mediated transcription, age-dependent axon degeneration, and premature death in flies [35]. Sustained NEP activation may also be detrimental in mammals because NEP can degrade a wide range of circulating peptides, including enkephalin, atrial natriuretic peptide, endothelin, and substance P [36]. Therefore, N1a has certain advantages over NEP as a therapeutic modality for AD with its unique capability of cleaving the more toxic oligomeric A $\beta$  and its relatively high substrate specificity.

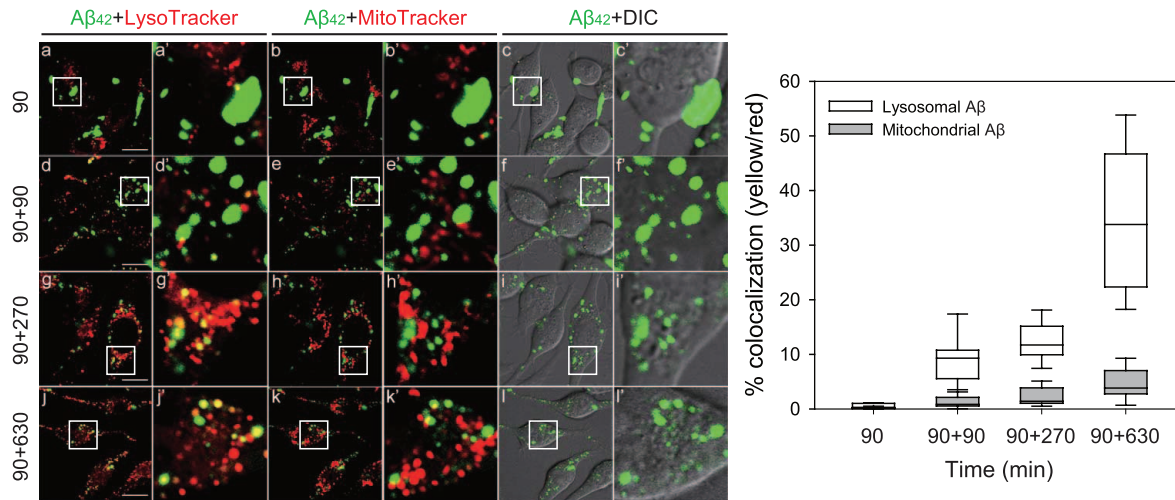

**Figure 4. Endocytosed oligomeric A $\beta$  accumulates in lysosomes and mitochondria.** Human neuroblastoma SH-SY5Y cells were treated with 2.5  $\mu$ M of Alexa Fluor-labeled A $\beta$  oligomers for 90 min (pulse) and were further incubated in fresh media for 90, 270, or 630 min (chase). Cells were co-stained with LysoTracker and MitoTracker, and observed under a confocal microscope. The images indicated by the open boxes are shown in a higher magnification in the adjacent columns. The yellow color in the merged image indicates co-localization of green (Alexa Fluor 488-labeled A $\beta$ ) and red (LysoTracker, Red/MitoTracker, Deep Red) fluorescence. The percentages of lysosomes (white bars) or mitochondria (gray bars) that co-localized with A $\beta$  were plotted. Scale bar, 50  $\mu$ m. Each bar and error bar represents the mean  $\pm$  SD ( $n = 10$ ). DIC, differential interference contrast. doi:10.1371/journal.pone.0098650.g004

The controversy surrounding the molecular mechanism underlying the cytotoxicity of A $\beta$  in brains has yet to be settled. Among the several hypotheses, one suggests that A $\beta$  exerts its detrimental effects partly by interfering with mitochondrial functions. A $\beta$  is internalized via raft-mediated endocytosis [37]. The internalized A $\beta$  reaches the mitochondria, where it binds to a mitochondrial enzyme called A $\beta$ -binding alcohol dehydrogenase (ABAD). It remains to be seen how the endocytosed, thus intraluminal, A $\beta$  reaches the mitochondria. The interaction between A $\beta$  and ABAD promotes leakage of ROS, mitochondrial dysfunction, and cell death [38]. Furthermore, inhibition of the A $\beta$ -ABAD interaction using a decoy peptide improves mitochondrial function in AD mice [39]. N1a did not interfere with the internalization of A $\beta$  or with the transport of A $\beta$  to lysosomes, but reduced the amounts of A $\beta$  localized in mitochondria (Figure 5). Therefore, it appears that N1a cleaves A $\beta$  that was in transit from lysosomes to mitochondria. Our chase experiments suggest that A $\beta$  travels through endosomes and lysosomes and that a portion of A $\beta$  further travels to mitochondria (Figure 4). Considering that N1a functions primarily in the cytosol, it is possible that A $\beta$  transiently passes the cytosol during transit from the lysosomes to mitochondria. However, we could not definitively test this hypothesis due to limitations in current imaging techniques. Interpretation of our data is also partially hampered by the fact that the traffic routes allowing the localization of A $\beta$  in mitochondria are largely unknown.

Collectively, we demonstrated that N1a prevents A $\beta$ -mediated cytotoxicity and associated mitochondrial dysfunction by reducing the amounts of A $\beta$  localized in the mitochondria. During the pathogenesis of AD, the route linking lysosomes to mitochondria can be viewed as a “Thermopylae pass”. Annihilation of the invading A $\beta$  at this “pass” can be a winning strategy in the battle against AD.

## Materials and Methods

### Reagents and Materials

Synthetic A $\beta_{42}$  peptide was purchased from Anygen (Gwangju, Korea). Active recombinant human NEP was from Enzo Life

Science International (Farmingdale, NY, USA). Mouse monoclonal anti-A $\beta$  antibody against residues 1–16 (6E10) was purchased from Covance (Princeton, NJ, USA). DHE was from Sigma-Aldrich (St Louis, MO, USA). JC-1, LysoTracker Red DND-99, and MitoTracker Deep Red FM were from Molecular Probes (Eugene, OR, USA). Unless otherwise noted, all other chemicals and reagents were purchased from Sigma.

### Preparation of A $\beta_{42}$ Oligomer

A $\beta_{42}$  oligomers were prepared according to the method described by Stine *et al.* [40]. Synthetic A $\beta_{42}$  peptides were initially solubilized in 1,1,1,3,3,3-hexafluoroisopropanol (Fluka) to a concentration of 1 mM, to monomerize pre-existing aggregates. Following evaporation of the 1,1,1,3,3,3-hexafluoroisopropanol in a fume hood overnight, the resulting peptide film was stored desiccated at  $-20^{\circ}\text{C}$ . Subsequently, the peptide was resuspended in anhydrous dimethyl sulfoxide to a concentration of 2.5 mM and bath sonicated for 10 min. To enrich oligomers, phenol-red free Dulbecco’s modified Eagle’s medium (DMEM; Gibco) was added under continuous vortexing to bring the peptide to a final concentration of 100  $\mu$ M and incubated at  $4^{\circ}\text{C}$  for 24 h.

### Purification of the N1a Protease and *In vitro* Cleavage Assay

Purification of the N1a protease was performed as described by Han *et al.* [23]. For the *in vitro* cleavage assay, 0.5  $\mu$ M of purified N1a or recombinant NEP was incubated with 2.5  $\mu$ M of monomeric or oligomeric A $\beta$  in a time-dependent manner. The buffers used in this reaction were as follows: N1a (20 mM HEPES [pH 7.4], 10 mM KCl, 10 mM MgCl<sub>2</sub>) and NEP (50 mM Tris-HCl [pH 9.0], 0.05% Brij35). After incubation, the reaction mixture was separated on a PeptiGel (Elpis Biotech), blotted, and probed with the anti-A $\beta$  6E10 antibody [41].

### Cell Culture and DNA Transfection

Human neuroblastoma SH-SY5Y cells were grown in DMEM (Hyclone) supplemented with 10% fetal bovine serum (Hyclone),

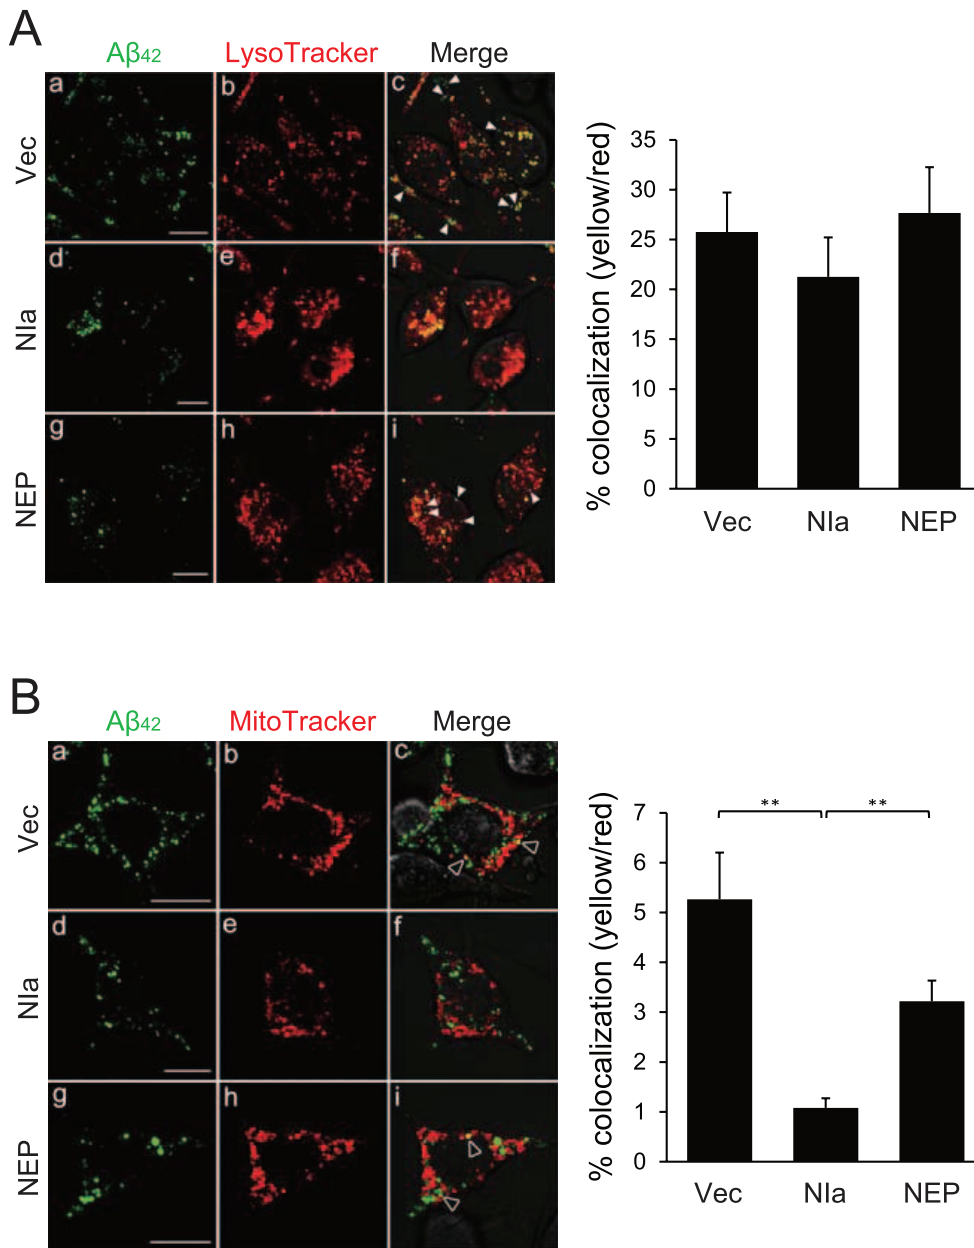

**Figure 5. N1a, but not NEP, prevents accumulation of A $\beta$  in mitochondria.** Human neuroblastoma SH-SY5Y cells were transfected with pcDNA with no insert (Vec), or with pcDNA with cDNA encoding HA-N1a (N1a) or HA-NEP (NEP). After 24 h of incubation, cells were treated with 2.5  $\mu$ M of Alexa Fluor 488-labeled A $\beta$  oligomers for an additional 18 h. Cells were stained with LysoTracker (**A**) or MitoTracker (**B**), and observed by confocal microscopy. White arrowheads in panel A indicate A $\beta$  that co-localized with lysosomes and open arrowheads in panel B indicate A $\beta$  that co-localized with mitochondria. The percentages of lysosomes or mitochondria that co-localized with A $\beta$  were plotted. Scale bar, 50  $\mu$ m. Each bar and error bar represents the mean  $\pm$  SD (n=10); \*\* $p$ <0.01. doi:10.1371/journal.pone.0098650.g005

100 U/ml penicillin, and 100  $\mu$ g/ml streptomycin (Invitrogen). Cells were transiently transfected with plasmid DNA using Lipofectamine LTX (Invitrogen) according to the manufacturer's instructions. To express the turnip mosaic virus N1a and the NEP protease in mammalian cells, codon-optimized N1a and NEP genes were subcloned into the pcDNA3 vector (Invitrogen) containing an N-terminal HA tag. A matching vector without an insert was used as a control.

#### Quantification of Cell Death/Survival

MTT (Sigma) was dissolved in phosphate buffered saline at a concentration of 2.5 mg/ml. A volume of MTT solution equivalent to 20% of the culture media volume was added to the cell culture at 37°C for 2 h. A volume of dimethyl sulfoxide (solubilization solution) equivalent to the culture media volume was added, and cells were placed on a shaker until the resulting formazan crystals were completely dissolved. The absorbance of the samples was measured at 570 nm, and the background absorbance of each well was measured at 690 nm. SH-SY5Y cells were examined for pyknotic nuclei by Hoechst 33342 staining

following the methods described by Wytenbach *et al.* [42] and Sellamuthu *et al.* [43].

### Measurement of $\Psi_m$

$\Psi_m$  was determined by staining SH-SY5Y cells with JC-1 and was measured by confocal microscopy. SH-SY5Y cells were cultured on poly-L-lysine-coated coverslips. After exposure to A $\beta$ , cells were incubated in DMEM containing 2.5  $\mu$ M JC-1 for 15 min at 37°C. The cells were washed and fluorescent images were then obtained immediately using a Fluoview FV 1000 confocal laser scanning microscope. Data were analyzed with MetaMorph imaging software to quantify the intensities of red and green fluorescence. The results were expressed as the ratio of red fluorescence to green fluorescence.

### Measurement of ROS Production

ROS production in SH-SY5Y cells was assayed using the oxidative fluorescent dye DHE. SH-SY5Y cells were cultured on poly-L-lysine-coated coverslips. After exposure to A $\beta$ , cells were loaded with 30  $\mu$ M of DHE for 30 min at 37°C. The cells were washed to remove excess DHE and fluorescent images were captured immediately using a Fluoview FV 1000 confocal laser scanning microscope. The excitation and emission wavelengths were 510 nm and 590 nm, respectively. Images were analyzed using MetaMorph imaging software. The number of fluorescent cells were counted and represented as a percentage of the total number of cells in each image field.

### Labeling of A $\beta_{42}$ Oligomers

The labeling reaction was performed using the Alexa Fluor 488 Microscale Protein Labeling Kit (Invitrogen). The procedure was described by Jungbauer *et al.* [44] in detail.

### Cellular Uptake of Alexa Fluor 488-labeled A $\beta_{42}$ Oligomers

SH-SY5Y cells were cultured on poly-L-lysine-coated coverslips for 24 h. The cells were treated with 2.5  $\mu$ M of Alexa Fluor 488-labeled A $\beta_{42}$  oligomers in phenol-red-free DMEM (Gibco) supplemented with 1% N2 supplement (Invitrogen), 100 U/ml penicillin, and 100  $\mu$ g/ml streptomycin (Invitrogen) for a further 90 min. At the end of the treatment, cells were further incubated for various lengths of time. Cells grown in the presence of Alexa Fluor 488-labeled A $\beta_{42}$  oligomers were stained with 200 nM of LysoTracker Red and 100 nM of MitoTracker Deep Red in phenol-red-free DMEM for 30 min at 37°C. The cells were washed extensively and were then visualized immediately using a Fluoview FV 1000 confocal laser scanning microscope equipped with 100 $\times$  and 60 $\times$  oil-immersion objectives and capable of additional 3–4 $\times$  zoom.

### Statistical Analysis

Results are expressed as the means  $\pm$  standard deviation (SD). Comparisons between two groups were performed using the Student's *t*-test. Comparisons between multiple groups were performed by one-way ANOVA with the Bonferroni correction. Statistical analyses were conducted with StatView software version 5.0 (SAS Institute Inc.). A *p*-value of less than 0.05 was considered statistically significant.

### Supporting Information

**Figure S1 Dose-dependent effects of oligomeric A $\beta$  on cell viability.** SH-SY5Y cells were incubated with various

concentrations of oligomeric A $\beta$  for 48 h. Cell viability was determined by using the MTT assay. Each bar and error bar represents the mean  $\pm$  SD (*n* = 4); \*\**p* < 0.01.

(EPS)

**Figure S2 Assessment of mitochondrial accumulation of A $\beta$  by confocal microscopy.** SH-SY5Y cells were treated with 2.5  $\mu$ M of Alexa Fluor-labeled A $\beta$  oligomers for 90 min and were further incubated in fresh media for 630 min. Cells were stained with MitoTracker and observed under a laser scanning confocal microscope. **(A)** Reconstruction of 3-D images was performed with 50–60 Z-directional slices (0.1  $\mu$ m thick) of the confocal images. The 3-D images were then virtually re-sliced in YZ axis (marked by white broken lines) to obtain transversal images (**a**<sub>1</sub>, **a**<sub>2</sub>). Open arrowheads indicate A $\beta$  that co-localized with mitochondria. Note that all the 2 yellow dots seen in XY planes (**a**) are also yellow when observed in YZ planes (**a**<sub>1</sub>, **a**<sub>2</sub>). Scale bar, 20  $\mu$ m. **(B)** The images of the individual Z slices were arranged by their positions along the Z-axis from top to bottom. Arrows in images #6–11 indicate the A $\beta$  fluorescence shown in panel a<sub>1</sub>, and arrows in images #19–23 indicate the A $\beta$  fluorescence shown in panel a<sub>2</sub>. (TIF)

**Figure S3 Fluorescence of Alexa Fluor-labeled A $\beta$  represents intact A $\beta$  in SH-SY5Y cells.** SH-SY5Y cells were treated with 2.5  $\mu$ M of Alexa Fluor-labeled A $\beta$  (green) for 90 min and were further incubated in fresh media for 18 h. Cells were stained with MitoTracker Red CMXRos (red) and fixed with methanol for 4 min. A $\beta$  was detected either by fluorescence of Alexa Fluor (green) or by immunostaining with the 6E10 antibody (blue). **(A)** Images with low (panels a–e) and high (panels a'–e') magnifications were obtained using a confocal microscope. A filled arrow in merged images indicates A $\beta$  colocalized with MitoTracker, whereas open arrows indicate A $\beta$  not colocalized with MitoTracker. Scale bars, 10  $\mu$ m. **(B)** Pair-wise merged images were created using the images shown in panel A. Merge 1 shows that all Alexa signals are overlapped with 6E10 signals. Merge 2 and 3 show that one of the A $\beta$  signal is colocalized with MitoTracker. Scale bars, 10  $\mu$ m.

(PDF)

**Video S1 360-degree view of the reconstituted 3-D confocal images.** Video was created for the positive dot that was shown in Figure S2 (panel a<sub>1</sub>).

(AVI)

**Video S2 360-degree view of the reconstituted 3-D confocal images.** Video was created for the positive dot that was shown in Figure S2 (panel a<sub>2</sub>).

(AVI)

**Video S3 360-degree view of the reconstituted 3-D confocal images.** Video was created for one of the negative dots that were shown in Figure S2 (panel a).

(AVI)

**Video S4 360-degree view of the reconstituted 3-D confocal images.** Video was created for one of the negative dots that was shown in Figure S2 (panel a).

(AVI)

### Author Contributions

Conceived and designed the experiments: BS WJP. Performed the experiments: BS HO. Analyzed the data: BS SMP H-EH. Contributed reagents/materials/analysis tools: WKS. Wrote the paper: BS MY WJP.

## References

- Shoji M, Golde TE, Ghiso J, Cheung TT, Estus S, et al. (1992) Production of the Alzheimer amyloid beta protein by normal proteolytic processing. *Science* 258: 126–129.
- Blennow K, de Leon MJ, Zetterberg H (2006) Alzheimer's disease. *Lancet* 368: 387–403.
- Haass C, Steiner H (2001) Protofibrils, the unifying toxic molecule of neurodegenerative disorders? *Nat Neurosci* 4: 859–860.
- Klein WL, Krafft GA, Finch CE (2001) Targeting small Abeta oligomers: the solution to an Alzheimer's disease conundrum? *Trends Neurosci* 24: 219–224.
- Selkoe DJ (2002) Alzheimer's disease is a synaptic failure. *Science* 298: 789–791.
- Lacor PN, Buniel MC, Chang L, Fernandez SJ, Gong Y, et al. (2004) Synaptic targeting by Alzheimer's-related amyloid beta oligomers. *J Neurosci* 24: 10191–10200.
- Lesne S, Koh MT, Kotilinek L, Kaye R, Glabe CG, et al. (2006) A specific amyloid-beta protein assembly in the brain impairs memory. *Nature* 440: 352–357.
- Townsend M, Shankar GM, Mehta T, Walsh DM, Selkoe DJ (2006) Effects of secreted oligomers of amyloid beta-protein on hippocampal synaptic plasticity: a potent role for trimers. *J Physiol* 572: 477–492.
- Shankar GM, Li S, Mehta TH, Garcia-Munoz A, Shepardson NE, et al. (2008) Amyloid-beta protein dimers isolated directly from Alzheimer's brains impair synaptic plasticity and memory. *Nat Med* 14: 837–842.
- Villemagne VL, Perez KA, Pike KE, Kok WM, Rowe CC, et al. (2010) Blood-borne amyloid-beta dimer correlates with clinical markers of Alzheimer's disease. *J Neurosci* 30: 6315–6322.
- Dahlgren KN, Manelli AM, Stine WB, Jr., Baker LK, Krafft GA, et al. (2002) Oligomeric and fibrillar species of amyloid-beta peptides differentially affect neuronal viability. *J Biol Chem* 277: 32046–32053.
- Glabe C (2000) Does Alzheimer disease tilt the scales of amyloid degradation versus accumulation? *Nat Med* 6: 133–134.
- Hawkes CA, Hartig W, Kacza J, Schliebs R, Weller RO, et al. (2011) Perivascular drainage of solutes is impaired in the ageing mouse brain and in the presence of cerebral amyloid angiopathy. *Acta Neuropathol* 121: 431–443.
- Iwata N, Tsubuki S, Takaki Y, Watanabe K, Sekiguchi M, et al. (2000) Identification of the major Abeta1-42-degrading catabolic pathway in brain parenchyma: suppression leads to biochemical and pathological deposition. *Nat Med* 6: 143–150.
- Shirotani K, Tsubuki S, Iwata N, Takaki Y, Harigaya W, et al. (2001) Nephrylin degrades both amyloid beta peptides 1–40 and 1–42 most rapidly and efficiently among thiorphan- and phosphoramidon-sensitive endopeptidases. *J Biol Chem* 276: 21895–21901.
- Leissring MA, Farris W, Chang AY, Walsh DM, Wu X, et al. (2003) Enhanced proteolysis of beta-amyloid in APP transgenic mice prevents plaque formation, secondary pathology, and premature death. *Neuron* 40: 1087–1093.
- Marr RA, Rockenstein E, Mukherjee A, Kindy MS, Hersh LB, et al. (2003) Nephrylin gene transfer reduces human amyloid pathology in transgenic mice. *J Neurosci* 23: 1992–1996.
- Hemming ML, Patterson M, Reske-Nielsen C, Lin L, Isacson O, et al. (2007) Reducing amyloid plaque burden via ex vivo gene delivery of an Abeta-degrading protease: a novel therapeutic approach to Alzheimer disease. *PLoS Med* 4: e262.
- Farris W, Schutz SG, Cirrito JR, Shankar GM, Sun X, et al. (2007) Loss of nephrylin function promotes amyloid plaque formation and causes cerebral amyloid angiopathy. *Am J Pathol* 171: 241–251.
- Spencer B, Marr RA, Rockenstein E, Crews L, Adame A, et al. (2008) Long-term nephrylin gene transfer is associated with reduced levels of intracellular Abeta and behavioral improvement in APP transgenic mice. *BMC Neurosci* 9: 109.
- Meilandt WJ, Cisse M, Ho K, Wu T, Esposito LA, et al. (2009) Nephrylin overexpression inhibits plaque formation but fails to reduce pathogenic Abeta oligomers and associated cognitive deficits in human amyloid precursor protein transgenic mice. *J Neurosci* 29: 1977–1986.
- Kang H, Lee YJ, Goo JH, Park WJ (2001) Determination of the substrate specificity of turnip mosaic virus Nla protease using a genetic method. *J Gen Virol* 82: 3115–3117.
- Han HE, Sellamuthu S, Shin BH, Lee YJ, Song S, et al. (2010) The nuclear inclusion a (Nla) protease of turnip mosaic virus (TuMV) cleaves amyloid-beta. *PLoS One* 5: e15645.
- Kim TK, Han HE, Kim H, Lee JE, Choi D, et al. (2012) Expression of the plant viral protease Nla in the brain of a mouse model of Alzheimer's disease mitigates Abeta pathology and improves cognitive function. *Exp Mol Med* 44: 740–748.
- Reddy PH, Beal MF (2008) Amyloid beta, mitochondrial dysfunction and synaptic damage: implications for cognitive decline in aging and Alzheimer's disease. *Trends Mol Med* 14: 45–53.
- Pagani L, Eckert A (2011) Amyloid-Beta interaction with mitochondria. *Int J Alzheimers Dis* 2011: 925050.
- Sirk D, Zhu Z, Wadia JS, Shulyakova N, Phan N, et al. (2007) Chronic exposure to sub-lethal beta-amyloid (Abeta) inhibits the import of nuclear-encoded proteins to mitochondria in differentiated PC12 cells. *J Neurochem* 103: 1989–2003.
- Wang X, Su B, Siedlak SL, Moreira PI, Fujioka H, et al. (2008) Amyloid-beta overproduction causes abnormal mitochondrial dynamics via differential modulation of mitochondrial fission/fusion proteins. *Proc Natl Acad Sci U S A* 105: 19318–19323.
- Rhein V, Song X, Wiesner A, Ittner LM, Baysang G, et al. (2009) Amyloid-beta and tau synergistically impair the oxidative phosphorylation system in triple transgenic Alzheimer's disease mice. *Proc Natl Acad Sci U S A* 106: 20057–20062.
- Li YP, Bushnell AF, Lee CM, Perlmutter LS, Wong SK (1996) Beta-amyloid induces apoptosis in human-derived neurotypic SH-SY5Y cells. *Brain Res* 738: 196–204.
- Magrane J, Christensen RA, Rosen KM, Veereshwarayya V, Querfurth HW (2006) Dissociation of ERK and Akt signaling in endothelial cell angiogenic responses to beta-amyloid. *Exp Cell Res* 312: 996–1010.
- Chapman KE, Sinclair SE, Zhuang D, Hassid A, Desai LP, et al. (2005) Cyclic mechanical strain increases reactive oxygen species production in pulmonary epithelial cells. *Am J Physiol Lung Cell Mol Physiol* 289: L834–841.
- Shelat PB, Chalimoniuk M, Wang JH, Strosznajder JB, Lee JC, et al. (2008) Amyloid beta peptide and NMDA induce ROS from NADPH oxidase and AA release from cytosolic phospholipase A2 in cortical neurons. *J Neurochem* 106: 45–55.
- Selkoe DJ (2001) Clearing the brain's amyloid cobwebs. *Neuron* 32: 177–180.
- Iijima-Ando K, Hearn SA, Granger L, Shenton C, Gatt A, et al. (2008) Overexpression of nephrylin reduces alzheimer amyloid-beta42 (Abeta42)-induced neuron loss and intraneuronal Abeta42 deposits but causes a reduction in cAMP-responsive element-binding protein-mediated transcription, age-dependent axon pathology, and premature death in *Drosophila*. *J Biol Chem* 283: 19066–19076.
- Turner AJ, Isaac RE, Coates D (2001) The nephrylin (NEP) family of zinc metalloendopeptidases: genomics and function. *Bioessays* 23: 261–269.
- Saavedra L, Mohamed A, Ma V, Kar S, de Chaves EP (2007) Internalization of beta-amyloid peptide by primary neurons in the absence of apolipoprotein E. *J Biol Chem* 282: 35722–35732.
- Lustbader JW, Cirilli M, Lin C, Xu HW, Takuma K, et al. (2004) ABAD directly links Abeta to mitochondrial toxicity in Alzheimer's disease. *Science* 304: 448–452.
- Yao J, Du H, Yan S, Fang F, Wang C, et al. (2011) Inhibition of amyloid-beta (Abeta) peptide-binding alcohol dehydrogenase-Abeta interaction reduces Abeta accumulation and improves mitochondrial function in a mouse model of Alzheimer's disease. *J Neurosci* 31: 2313–2320.
- Stine WB, Jr., Dahlgren KN, Krafft GA, LaDu MJ (2003) In vitro characterization of conditions for amyloid-beta peptide oligomerization and fibrillogenesis. *J Biol Chem* 278: 11612–11622.
- Kim KS, Miller DL, Sapienza VJ, Chen CMJ, Bai C, et al. (1988) Production and characterization of monoclonal antibodies reactive to synthetic cerebrovascular amyloid peptide. *Neuroscience Research Communications* 2: 121–130.
- Wyttenbach A, Sauvageot O, Carmichael J, Diaz-Latoud C, Arrigo AP, et al. (2002) Heat shock protein 27 prevents cellular polyglutamine toxicity and suppresses the increase of reactive oxygen species caused by huntingtin. *Hum Mol Genet* 11: 1137–1151.
- Sellamuthu S, Shin BH, Han HE, Park SM, Oh HJ, et al. (2011) An engineered viral protease exhibiting substrate specificity for a polyglutamine stretch prevents polyglutamine-induced neuronal cell death. *PLoS One* 6: e22554.
- Jungbauer LM, Yu C, Laxton KJ, LaDu MJ (2009) Preparation of fluorescently-labeled amyloid-beta peptide assemblies: the effect of fluorophore conjugation on structure and function. *J Mol Recognit* 22: 403–413.
